# Supplementary material for: Hydrogen bond-mediated recognition of the chemical warfare agent soman (GD)
Source: Royal Society of Chemistry journal article supplement (doi:10.1039/c2cc31096a), 2012-01-01
Supplement: c2cc31096a.pdf [file c2cc31096a.pdf]

## Supplementary Information

### Hydrogen bond-mediated recognition of the chemical warfare agent soman (GD)

Mark R. Sambrook,<sup>a\*</sup> Jennifer R. Hiscock,<sup>b</sup> Alexandra Cook,<sup>c</sup> A. Christopher Green,<sup>c</sup> Ian Holden,<sup>a</sup> Jack C. Vincent,<sup>a</sup> Philip A. Gale,<sup>b\*</sup>

*a*, Detection Department, Dstl Porton Down, Salisbury, SP4 0JQ, UK; *b*, Department of Chemistry, University of Southampton, Highfield, Southampton, SO17 1BJ; *c*, Biomedical Sciences Department, Dstl Porton Down, Salisbury, SP4 0JQ, UK

[\\*Philip.gale@soton.ac.uk](mailto:Philip.gale@soton.ac.uk); [msambrook@dstl.gov.uk](mailto:msambrook@dstl.gov.uk)

### Experimental details

The chemical warfare agent (CWA) soman (GD) was obtained in-house at Dstl and confirmed as >99% using standard methods. Deuterated solvents were purchased from Goss Scientific (Cheshire, UK) and used as received. Receptors **1-4** were prepared and characterised as reported previously.<sup>1</sup> NMR spectra were obtained on a JEOL Eclipse+ 500 instrument (operating at 500 MHz for <sup>1</sup>H and 202 MHz <sup>31</sup>P spectra) or a JEOL Eclipse+ 300 instrument (operating at 300 MHz for <sup>1</sup>H and 121.5 MHz for <sup>31</sup>P). <sup>31</sup>P spectra were referenced externally using (MeO<sub>3</sub>)P (δ 141.3 ppm).

### Assessment of binding interactions

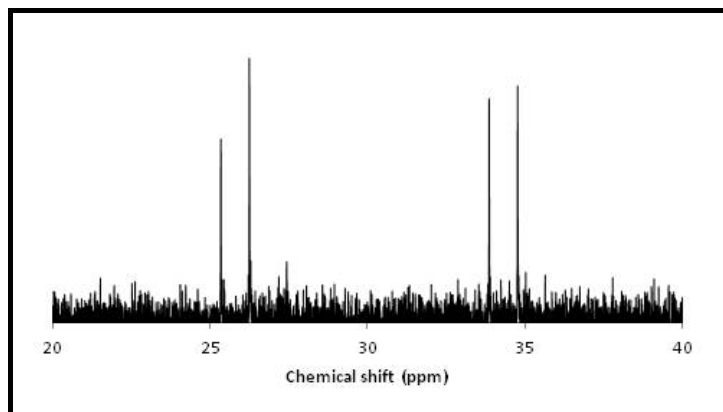

Figure S1. <sup>31</sup>P NMR spectrum of GD. Solvent: MeCN-*d*<sub>3</sub> 98%/DMSO-*d*<sub>6</sub> 2%. T = 293 K

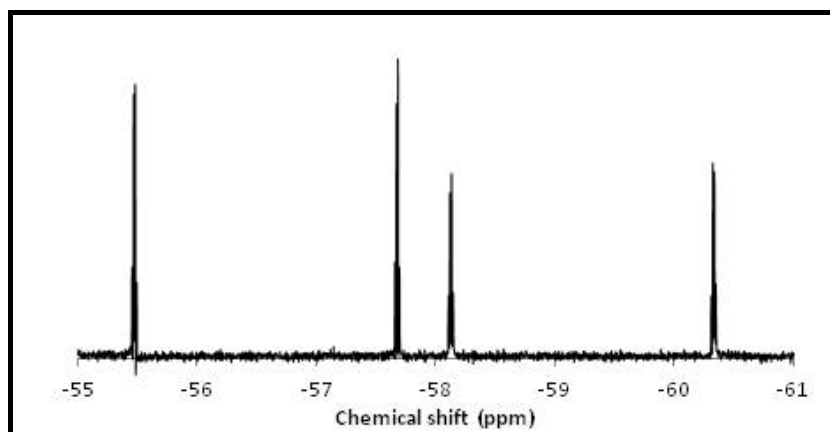

Figure S2.  $^{19}\text{F}$  NMR spectrum of GD. Solvent:  $\text{MeCN-}d_3$  98%/DMSO- $d_6$  2%. T = 293 K.

|          | Receptor $^1\text{H}$ NMR perturbations (ppm) |        |       | GD $^{31}\text{P}$ NMR shift perturbations (ppm) |      |      |      |
|----------|-----------------------------------------------|--------|-------|--------------------------------------------------|------|------|------|
|          | urea                                          | indole | amide |                                                  |      |      |      |
| <b>2</b> | 0.05                                          | 0.10   | 0.06  | 0.04                                             | 0.05 | 0.05 | 0.05 |
| <b>3</b> | 0.09                                          | 0.09   | 0.13  | 0.02                                             | 0.02 | 0.02 | 0.02 |

Table S1. Table of  $^1\text{H}$  and  $^{31}\text{P}$  NMR chemical shift perturbations for receptors **2** and **3** in  $\text{MeCN-}d_3$  98%/DMSO- $d_6$  2%. [receptor] = [GD] =  $5.5 \times 10^{-3}$  mol  $\text{dm}^{-3}$ . T = 293 K.

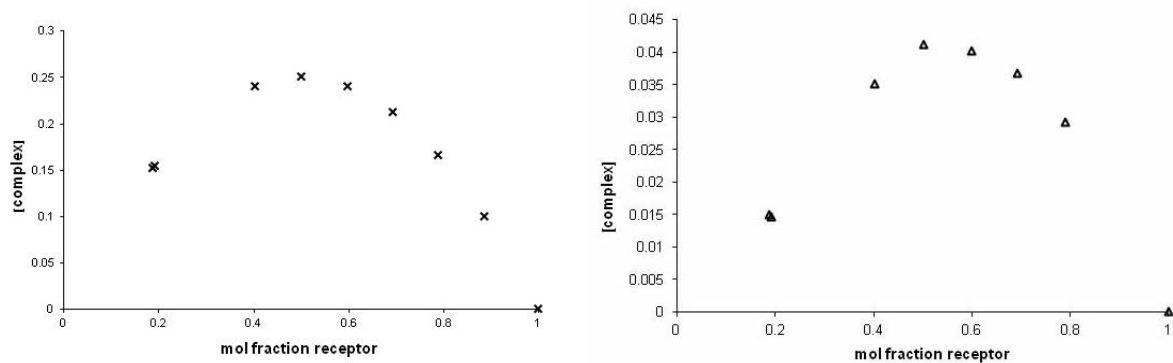

Figure S3. Job plots analysis of receptor **2** plus GD in  $\text{MeCN-}d_3$  98%/DMSO- $d_6$  2%, where x = amide,  $\Delta$  = urea.  $[\mathbf{2}] + [\text{GD}] = 5.5 \times 10^{-3}$  mol  $\text{dm}^{-3}$ . T = 293 K.

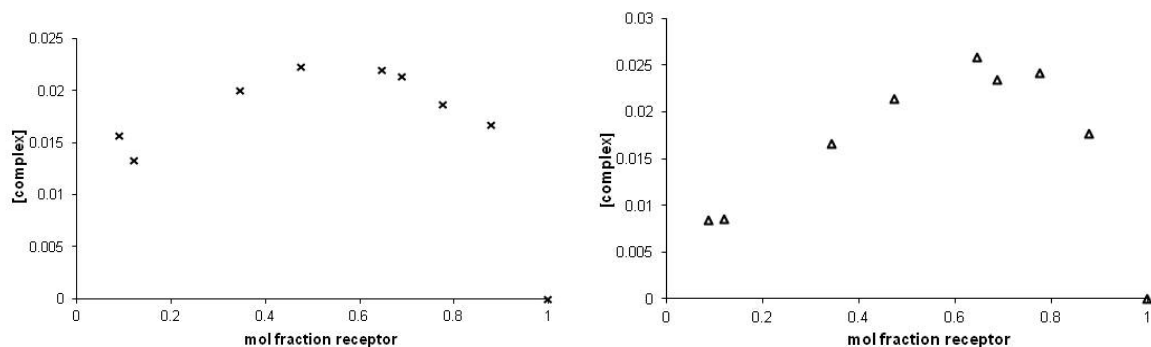

Figure S4. Job plot analysis of receptor **3** plus GD in MeCN- $d_3$  98%/DMSO- $d_6$  2%, where x= amide,  $\Delta$ = urea.  $[\mathbf{3}] + [\text{GD}] = 5.5 \times 10^{-3} \text{ mol dm}^{-3}$ . T = 293 K.

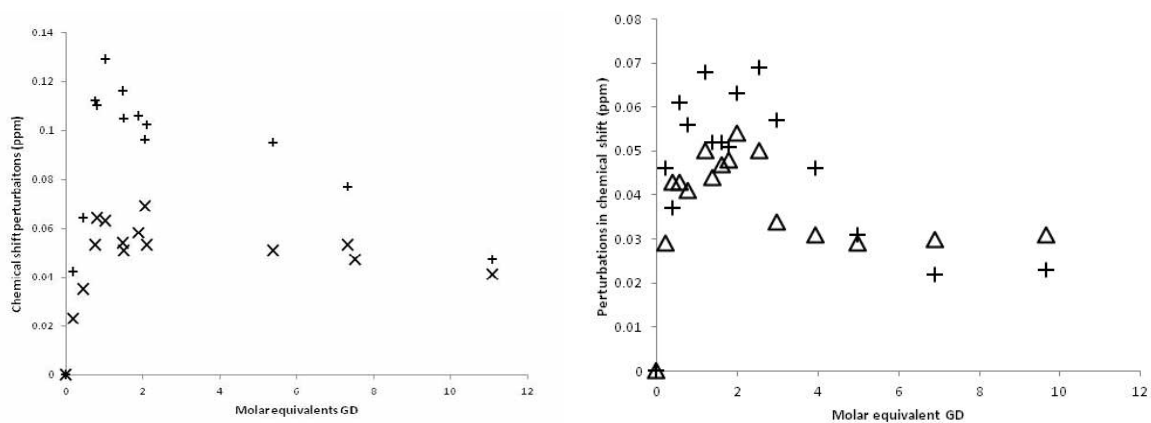

Figure S5.  $^1\text{H}$  NMR titration binding curves for (left) receptor **2** and (right) receptor **3**, where + = indole protons, x = amide protons and  $\Delta$  = urea. Solvent MeCN- $d_3$  98%/DMSO- $d_6$  2%;  $[\text{Receptor}]_{\text{initial}} = 1.75 \times 10^{-3} \text{ mol dm}^{-3}$ . T = 293 K.

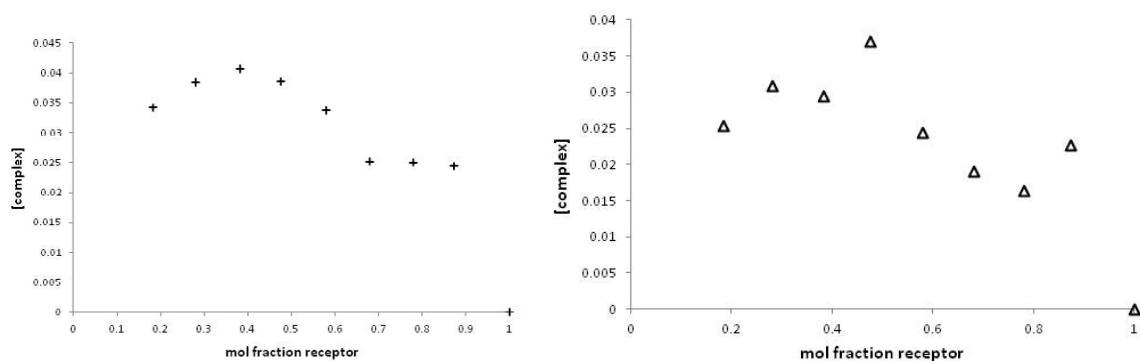

Figure S6. Job plot analysis of receptor **2** plus GD in MeCN- $d_3$  95%/DMSO- $d_6$  5%, where x= amide,  $\Delta$  = urea.  $[3] + [GD] = 5.5 \times 10^{-3} \text{ mol dm}^{-3}$ . T = 293 K.

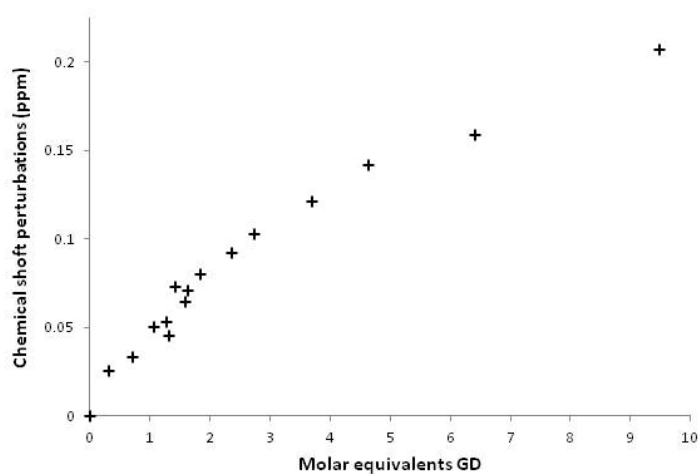

Figure S7.  $^1\text{H}$  NMR titration binding curve for receptor **2** plus GD in MeCN- $d_3$  95%/DMSO- $d_6$  5% where + = indole protons.  $[\text{Receptor}]_{\text{initial}} = 1.75 \times 10^{-3} \text{ mol dm}^{-3}$ . T = 293 K.

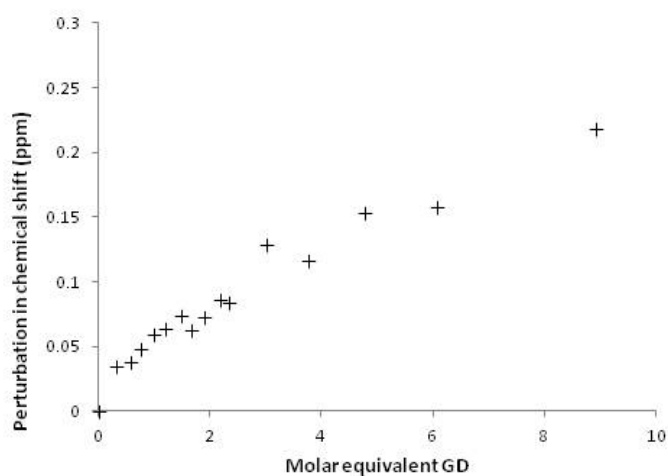

Figure S8.  $^1\text{H}$  NMR titration binding curve for receptor **2** plus GD in MeCN- $d_3$  97%/DMSO- $d_6$  3% where + = indole protons.  $[\text{Receptor}]_{\text{initial}} = 1.75 \times 10^{-3} \text{ mol dm}^{-3}$ . T = 293 K.

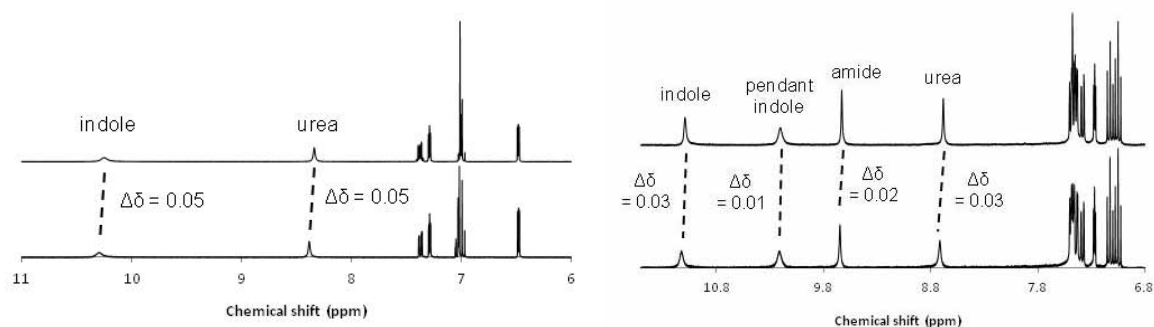

Figure S9. Region of the  $^1\text{H}$  NMR spectra of receptors (left) **1** and (right) **4** in the absence (top) and presence (bottom) of equimolar concentrations of GD revealing downfield perturbations in indole, urea, amide and pendant indole proton environments.  $[\text{receptor}] = [\text{GD}] = 5.5 \times 10^{-3} \text{ mol dm}^{-3}$ .  $T = 293 \text{ K}$ .

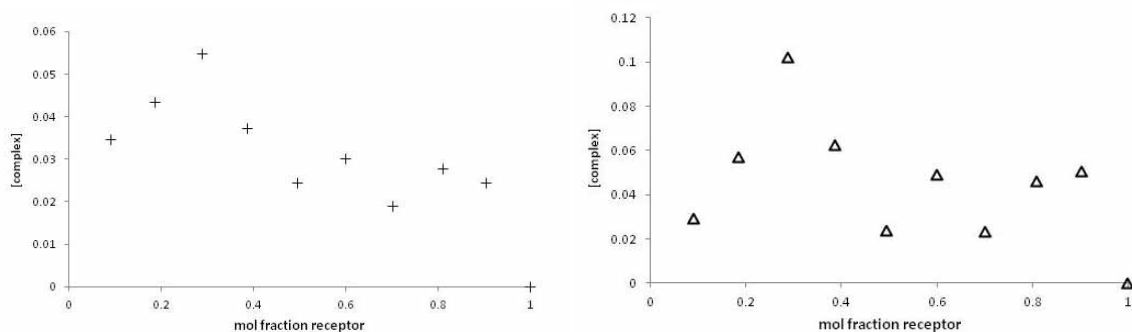

Figure S10. Job plot analyses of receptor **1** plus GD, where + = indole,  $\Delta$  = (urea). Solvent =  $\text{MeCN-}d_3$  95%/DMSO- $d_6$  5%.  $[\mathbf{1}] + [\text{GD}] = 5.5 \times 10^{-3} \text{ mol dm}^{-3}$ .  $T = 293 \text{ K}$ .

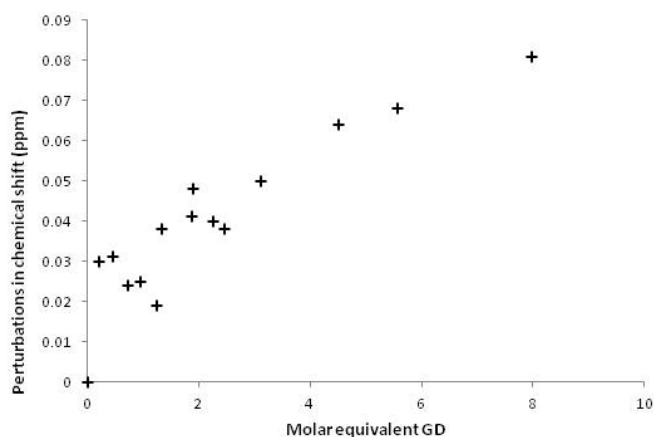

Figure S11:  $^1\text{H}$  NMR titration binding curve for receptor **1** plus GD in  $\text{MeCN-}d_3$  95%/DMSO- $d_6$  5% where + = indole protons.  $[\text{Receptor}]_{\text{initial}} = 1.75 \times 10^{-3} \text{ mol dm}^{-3}$ .  $T = 293 \text{ K}$ .

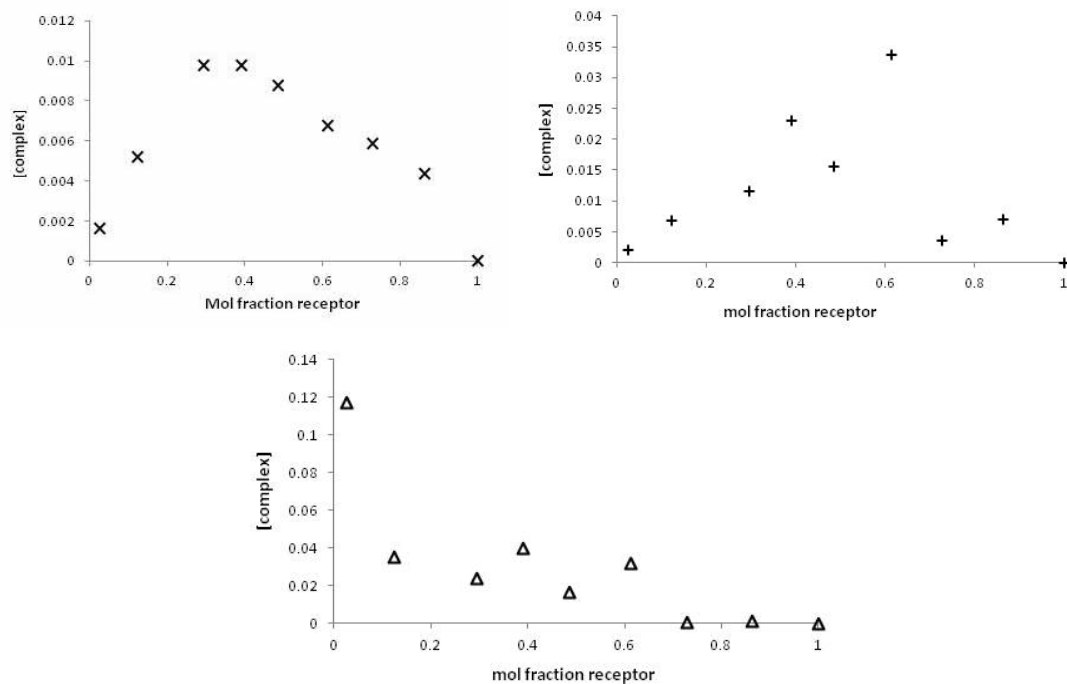

Figure S12. Job plot analysis of receptor **4** with GD, where x = amide, + = indole, Δ = urea.  $[4] + [GD] = 5.5 \times 10^{-3} \text{ mol dm}^{-3}$ . T = 293 K.

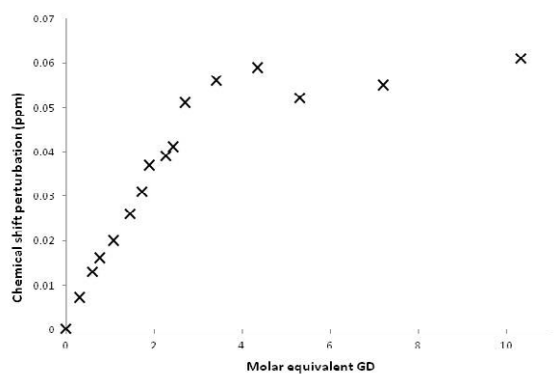

Figure S13.  $^1\text{H}$  NMR binding curve for receptor **4** plus GD in  $\text{MeCN-}d_3$  95%/DMSO- $d_6$  5% where x = amide protons.  $[\text{Receptor}]_{\text{initial}} = 1.75 \times 10^{-3} \text{ mol dm}^{-3}$ . T = 293 K.

```
MacSPARTAN '10 Quantum Mechanics Program: (x86/Darwin) build 10.0.1v4
Job type: Geometry optimization.
Method: RB3LYP
Basis set: 6-31G(D)
Number of shells: 193
Number of basis functions: 559
Multiplicity: 1
SCF model:
A restricted hybrid HF-DFT SCF calculation will be
performed using Pulay DIIS + Geometric Direct Minimization
Optimization:
Step Energy Max Grad. Max Dist.
1 -1818.588643 0.043127 0.089850
2 -1818.618090 0.023993 0.111295
3 -1818.629290 0.008849 0.156100
4 -1818.632271 0.004939 0.145954
5 -1818.633786 0.003754 0.136318
6 -1818.634791 0.003505 0.125929
7 -1818.635628 0.003898 0.107583
8 -1818.636278 0.004753 0.107889
9 -1818.636823 0.005151 0.102039
10 -1818.637258 0.004806 0.111683
11 -1818.637658 0.006534 0.091618
12 -1818.638194 0.008680 0.106890
13 -1818.638507 0.004659 0.089530
14 -1818.638884 0.006678 0.051957
15 -1818.639078 0.002395 0.108247
16 -1818.639253 0.005103 0.087769
17 -1818.639399 0.004443 0.083051
18 -1818.639523 0.003381 0.044993
19 -1818.639601 0.003694 0.066356
20 -1818.639679 0.003515 0.068521
21 -1818.639745 0.003763 0.044659
22 -1818.639790 0.003986 0.020756
23 -1818.639862 0.004072 0.055354
24 -1818.639923 0.003926 0.029547
25 -1818.639967 0.004025 0.032421
26 -1818.640027 0.003427 0.037676
27 -1818.640103 0.003499 0.039273
28 -1818.640164 0.002943 0.041104
29 -1818.640245 0.002607 0.036285
30 -1818.640307 0.002813 0.031323
31 -1818.640373 0.002524 0.050655
32 -1818.640427 0.002636 0.052320
33 -1818.640484 0.002522 0.050135
34 -1818.640518 0.002550 0.025297
35 -1818.640548 0.002444 0.026449
36 -1818.640572 0.002367 0.019183
37 -1818.640593 0.002392 0.026648
38 -1818.640611 0.002317 0.018275
39 -1818.640631 0.002266 0.016017
40 -1818.640645 0.002122 0.012421
41 -1818.640660 0.001964 0.026108
42 -1818.640681 0.001768 0.034224
43 -1818.640701 0.001596 0.041175
44 -1818.640725 0.001423 0.047950
45 -1818.640752 0.001221 0.041261
46 -1818.640775 0.000991 0.045842
47 -1818.640803 0.000839 0.040612
48 -1818.640822 0.000613 0.030582
49 -1818.640819 0.000636 0.022435
50 -1818.640828 0.000764 0.018960
51 -1818.640839 0.000631 0.022585
52 -1818.640851 0.000731 0.015020
53 -1818.640862 0.001146 0.016650
54 -1818.640882 0.000805 0.034293
55 -1818.640896 0.000694 0.020915
56 -1818.640909 0.000561 0.028860
57 -1818.640918 0.000746 0.021258
58 -1818.640929 0.000944 0.022506
59 -1818.640959 0.001000 0.015103
60 -1818.640967 0.000927 0.010409
61 -1818.640978 0.000720 0.007118
62 -1818.640983 0.000476 0.006707
63 -1818.640994 0.000373 0.007101
64 -1818.641001 0.000321 0.007645
65 -1818.641008 0.000258 0.008940
66 -1818.641014 0.000260 0.009685
67 -1818.641019 0.000193 0.009591
68 -1818.641021 0.000171 0.004349
69 -1818.641023 0.000192 0.002173
70 -1818.641025 0.000174 0.001796
71 -1818.641025 0.000180 0.001830
Reason for exit: Successful completion
Quantum Calculation CPU Time : 11:55:34.54
Quantum Calculation Wall Time: 12:25:37.91
SPARTAN PROPERTIES PACKAGE: MAC/P4 build 10.0.1
Reason for exit: Successful completion
Properties CPU Time : 7.56
Properties Wall Time: 7.76
molecule M0001 terminated normally
End- molecule "M0001" Thu Jan 19 03:58:31 2012
```

Table S1 DFT calculation of the structure of the 1.GD complex

## References

1. P. A. Gale, J. R. Hiscock, C. Z. Jie, M. B. Hursthouse and M. E. Light, *Chem. Sci.* 2010, **1**, 215-220.
